# Supplementary material for: Medium-Chain Length Fatty Acids Enhance Aβ Degradation by Affecting Insulin-Degrading Enzyme
Source: MDPI journal article supplement (doi:10.3390/cells10112941), 2021-10-29
Supplement: s1 [file s1]

## Supplementary Materials

### Medium-chain length fatty acids enhance A $\beta$ degradation by affecting insulin-degrading enzyme

Janine Mett <sup>1</sup>, Anna A. Lauer <sup>2</sup>, Daniel Janitschke <sup>2</sup>, Lea V. Griebisch <sup>2</sup>, Elena L. Theiss <sup>2</sup>, Heike S. Grimm <sup>2</sup>, Hennariikka Koivisto <sup>3</sup>, Heikki Tanila <sup>3</sup>, Tobias Hartmann <sup>2,4</sup> and Marcus O. W. Grimm <sup>2,4,5\*</sup>

#### Supplementary Figure S1

##### A incubation with PC10:0-14:0

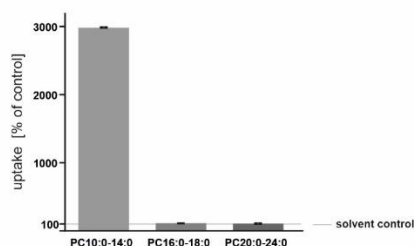

##### B incubation with PC16:0-18:0

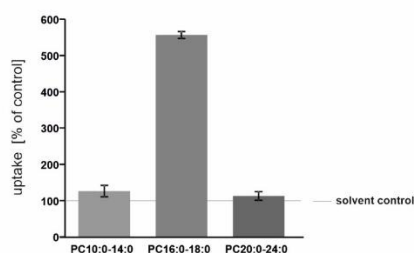

##### C incubation with PC20:0-24:0

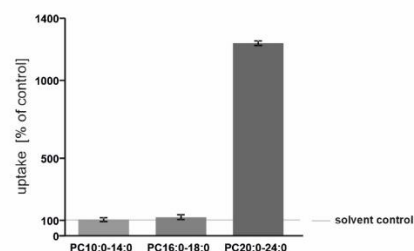

**Supplementary Figure S1. Phospholipid uptake by Neuro2a cells.** PC profile of Neuro2a control cells incubated with PC10:0-14:0 (**a**) ( $n = 3$ ), PC16:0-18:0 ( $n = 3$ ) (**b**) or PC20:0-24:0 ( $n = 3$ ) (**c**) measured by mass spectrometry. No significant correlation was found between the uptake of the single PC species and the observed effects on A $\beta$  degradation ( $p = 0.541$ ).

## Supplementary Figure S2

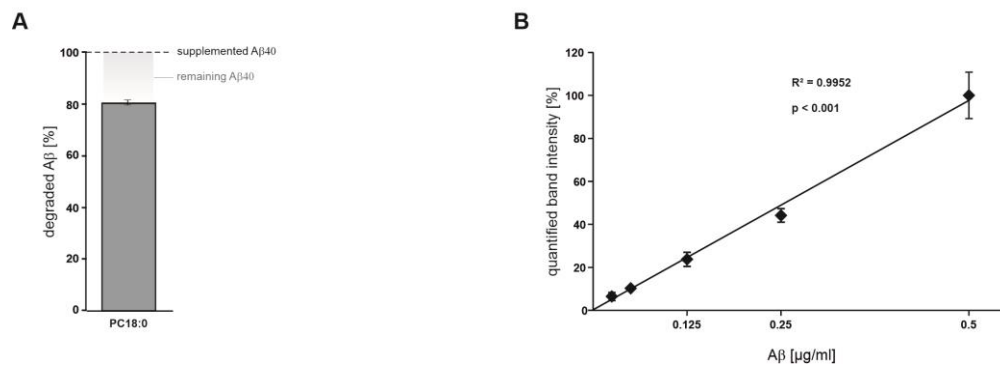

**Supplementary Figure S2. Western Blot analysis of total A $\beta$  degradation.** (a) Percentage reduction of the supplemented human A $\beta$ 40 after 6 h incubation with mouse Neuro2a control cells treated with PC18:0 (n = 12). (b) Significant linear correlation ( $R^2 = 0.9952$ ,  $p < 0.000$ ) between the quantified band intensities and synthetic human A $\beta$ 40 in the range of 0.5 -0  $\mu$ g/ ml (n = 4).

## Supplementary Figure S3

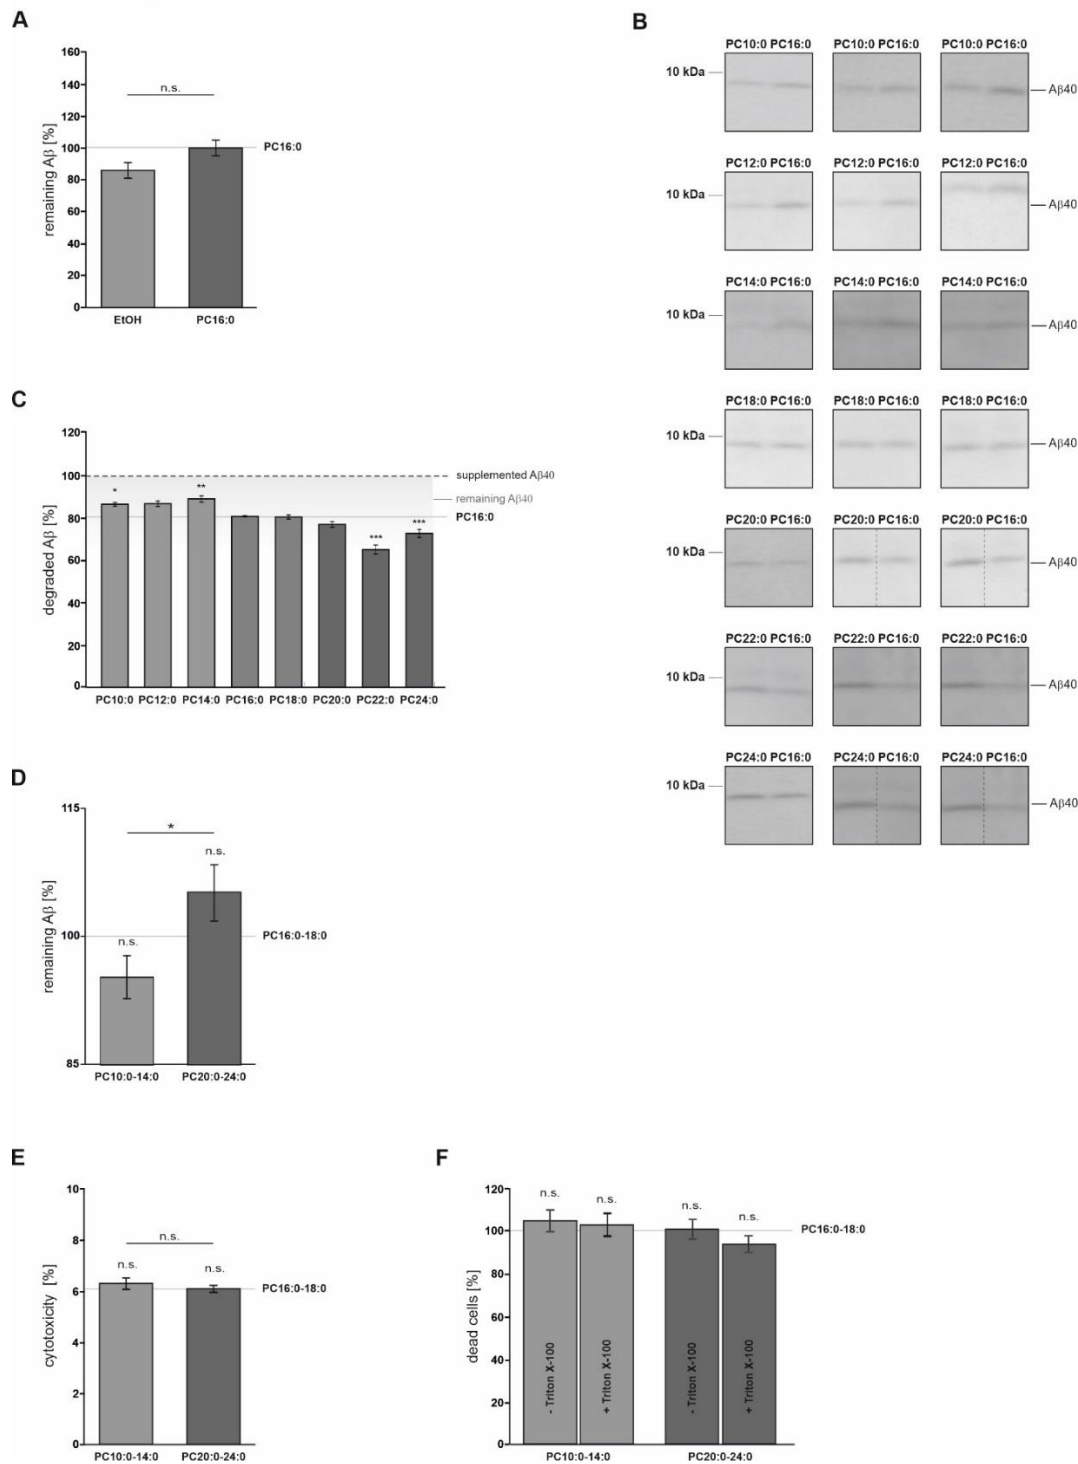

**Supplementary Figure S3. Effect of FA acyl chain length on cell viability and Aβ degradation in Neuro2a cells.** (a) Effect of the solvent EtOH on total Aβ degradation in mouse Neuro2a control cells compared to PC16:0 (set at 100 %) ( $n \geq 6$ ). (b) Representative Western blots for the effect of FA acyl chain length on Aβ degradation in Neuro2a control cells shown in Fig. 1A ( $n \geq 3$ ). (c) Percentage reduction in synthetic Aβ40 concentrations calculated based on the data shown in Fig. 1A ( $n \geq 3$ ). (d) Effect of the examined phospholipids on Aβ degradation in Neuro2a control cells measured by ELISA ( $n = 9$ ). (e) Cytotoxicity after incubation with the examined phospholipids as indicated by LDH activity in the cell culture medium ( $n \geq 9$ ) (f) and cellular uptake of propidium iodide ( $n \geq 25$ ) (-Triton X-100: dead cells after PC-treatment, + Triton X-100: total cell numbers after PC-treatment). Statistical significance was set as \*  $p \leq 0.05$ , \*\*  $p \leq 0.01$  and \*\*\*  $p \leq 0.001$ . n.s.: not significant.

## Supplementary Figure S4

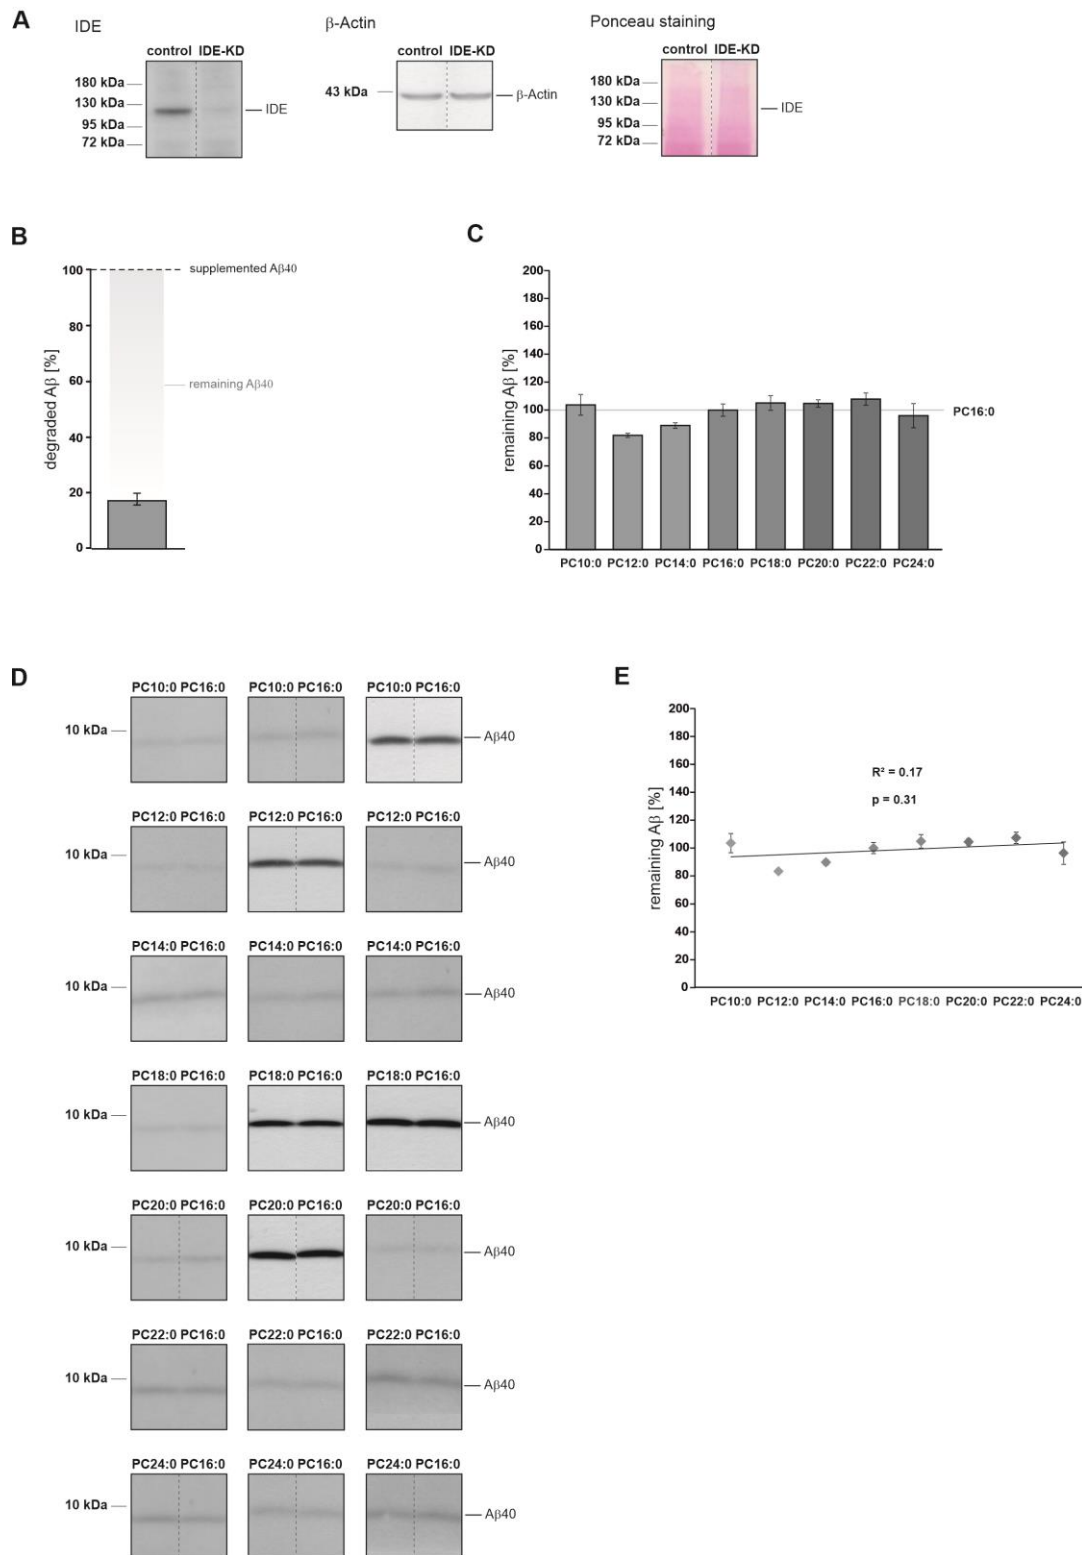

**Supplementary Figure S4. Effect of FA acyl chain length on Aβ degradation in stably transfected Neuro2a IDE-knockdown cells (Neuro2a IDE KD).** (a) IDE protein level in Neuro2a control and Neuro2a IDE KD cells. β-actin protein level and total protein staining with Ponceau S were used as loading controls. (b) Percentage reduction of the supplemented human Aβ40 after 6 h incubation with Neuro2a IDE KD (n = 5). (c) Effect of FA carbon chain length on total Aβ degradation in Neuro2a IDE KD cells compared to PC16:0 (set at 100 %) (n ≥ 3). (d) Representative Western blots for the effect of FA acyl chain length on Aβ degradation in Neuro2a IDE KD cells shown in (c) (n ≥ 3). (e) Correlation between the FA acyl chain length and the level of remaining human Aβ40 peptides after incubation with Neuro2a IDE KD.

## Supplementary Figure S5

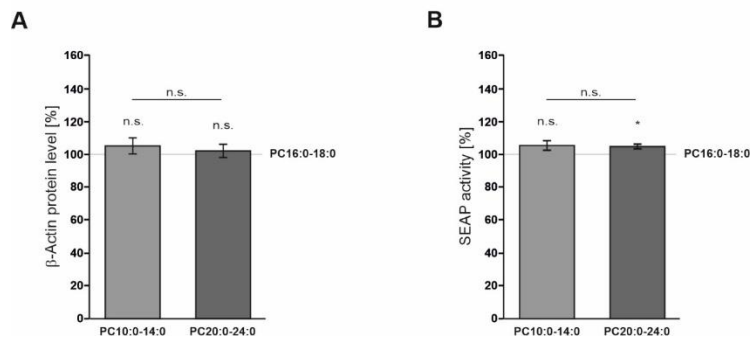

**Supplementary Figure S5. Effect of FA acyl chain length on  $\beta$ -actin protein level in Neuro2a cells and constitutive protein secretion (a)  $\beta$ -actin protein level in Neuro2a control cells treated with the examined phospholipids ( $n \geq 6$ ). (b) SEAP activity in the cell culture supernatant of Neuro2a control cells after incubation with phospholipids ( $n = 9$ ). Statistical significance was set as \*  $p \leq 0.05$ . n.s.: not significant.**

## Supplementary Table S1

| name             | FA composition             |
|------------------|----------------------------|
| coconut oil diet | <u>enriched in MCFAs:</u>  |
|                  | 45.4% lauric acid (12:0)   |
|                  | 18.0% myristic acid (14:0) |
|                  | 10.5% palmitic acid (16:0) |
|                  | 7.5% oleic acid (18:1)     |
|                  | 5.4% caprylic acid (8:0)   |
|                  | 8.4% capric acid (10:0)    |

**Supplementary Table S1. Composition of the diet enriched in coconut oil purchased from Merck / Sigma-Aldrich.** Data were obtained from the CRC Handbook of Chemistry & physics, 74<sup>th</sup> Ed. (1993-94), p. 7-29.
